# Supplementary material for: Association of Ambient and Household Air Pollution With Bone Mineral Content Among Adults in Peri-urban South India
Source: PubMed Central journal article supplement (PMC6991311; doi:10.1001/jamanetworkopen.2019.18504), 2020-01-03
Supplement: jamanetwopen-3-e1918504-s001.pdf [file jamanetwopen-3-e1918504-s001.pdf]

## Supplementary Online Content

Ranzani OT, Milà C, Kulkarni B, Kinra S, Tonne C. Association of ambient and household air pollution with bone mineral content among adults in peri-urban South India. *JAMA Netw Open*. 2019;3(1):e1918504.  
doi:10.1001/jamanetworkopen.2019.18504

**eAppendix 1.** Missing Data Description and Missingness Pattern

**eFigure 1.** Directed Acyclic Graph (DAG) Used to Select Confounding Factors

**eAppendix 2.** Inverse Probability Weighting to Account for Potential Selection Bias

**eFigure 2.** Associations Between Age and Bone Mineral Content (BMC), Bone Area (BA), and Bone Mineral Density (BMD) by Sex

**eFigure 3.** Associations Between Bone Mineral Content (BMC) and Bone Area (BA)

**eTable 1.** Mean Difference (95% CI) in Bone Mineral Content per Interquartile Range Increase in Annual Ambient Particulate Air Pollution, Without Inverse-Probability Correction (IPW)

**eFigure 4.** Association Between Long-Term Ambient Particulate Air Pollution and Hip/Lumbar Spine Bone Mineral Content Corrected by Bone Area With vs Without Between-Within Exposure Specification

**eTable 2.** Mean Difference (95% CI) in Bone Mineral Density (BMD) per Interquartile Range Increase in Annual Ambient Particulate Air Pollution

**eTable 3.** Single and Multi-Pollutant Models for the Mean Difference (95% CI) in Bone Mineral Content and Bone Mineral Density per Interquartile Range Increase in Annual Ambient Particulate Air Pollution

**eTable 4.** Association Between Annual Ambient Particulate Air Pollution and Bone Mineral Content at the Hip and Lumbar Spine Sites Among Those Aged  $\geq 40$  Years

**eTable 5.** Association Between Annual Ambient Particulate Air Pollution and Bone Mineral Density at the Hip and Lumbar Spine Sites Among Those Aged  $\geq 40$  Years

**eFigure 5.** Association Between Biomass Fuel and Hip/Lumbar Spine Bone Mineral Density (BMD) in All Population vs Exposure-Sex Interaction

**eFigure 6.** Association Between Biomass Fuel and Hip/Lumbar Spine Bone Mineral Content Corrected by Bone Area in All Population vs Exposure-Sex Interaction (Among Those Aged  $\geq 40$  Years)

**eFigure 7.** Association Between Biomass Fuel and Hip/Lumbar Spine Bone Mineral Density (BMD) in All Population vs Exposure-Sex Interaction (Among Those Aged  $\geq 40$  Years)

**eReferences.**

This supplementary material has been provided by the authors to give readers additional information about their work.

## eAppendix 1. Missing Data Description and Missingness Pattern

The missing data descriptions and missingness pattern of 3905 adult participants are shown below.

|                                                   |           | N                | %                |
|---------------------------------------------------|-----------|------------------|------------------|
| <b>Complete case</b>                              |           | 3717             | 95%              |
| <b>Participants with at least 1 missing value</b> |           | 188              | 5%               |
|                                                   |           |                  |                  |
| <b>Missing</b>                                    |           | <b>N missing</b> | <b>% missing</b> |
| Ambient air pollution                             | Exposure  | 130              | 3.33%            |
| Fuel type                                         | Exposure  | 52               | 1.33%            |
| Height                                            | Covariate | 3                | 0.08%            |
| Wb-physical activity                              | Covariate | 3                | 0.08%            |
| Fruits & vegetables                               | Covariate | 3                | 0.08%            |
| Calcium                                           | Covariate | 3                | 0.08%            |
| Smoking                                           | Covariate | 3                | 0.08%            |
| Occupation                                        | Covariate | 2                | 0.05%            |
| Education                                         | Covariate | 2                | 0.05%            |
| Sex                                               | Covariate | 2                | 0.05%            |
| % fatmass                                         | Covariate | 1                | 0.03%            |

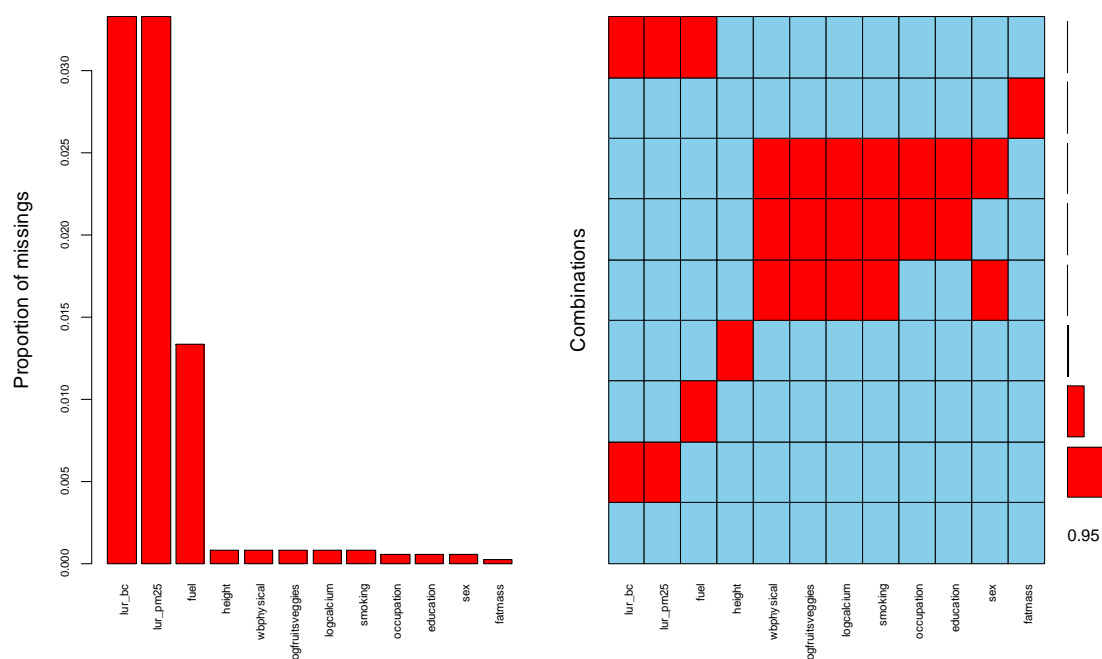

We had a priori decided that we would impute only covariates, but not exposure or outcomes. Without an accurate household geocoding, we believe to multiple impute them would suffer from model misspecification, because the main determinants of ambient air pollution are not in our analytical datasets, such as geographical and land-use indicators. Because there were only 7 participants with missing covariates, we based our analysis on complete case datasets (95%) rather than using multiple imputation.<sup>1</sup> We have clarified this in the revised version. In fact, our target was the adult population 18 years and older: therefore, from 3905 adults, we excluded  $181+7 = 188$  participants to generate our complete case data, which leads to only 5% of missing values. Given the

relatively small percentage of missing data, it is unlikely that complete case analysis results in materially biased estimates.<sup>1</sup>

**eFigure 1.** Directed Acyclic Graph (DAG) Used to Select Confounding Factors

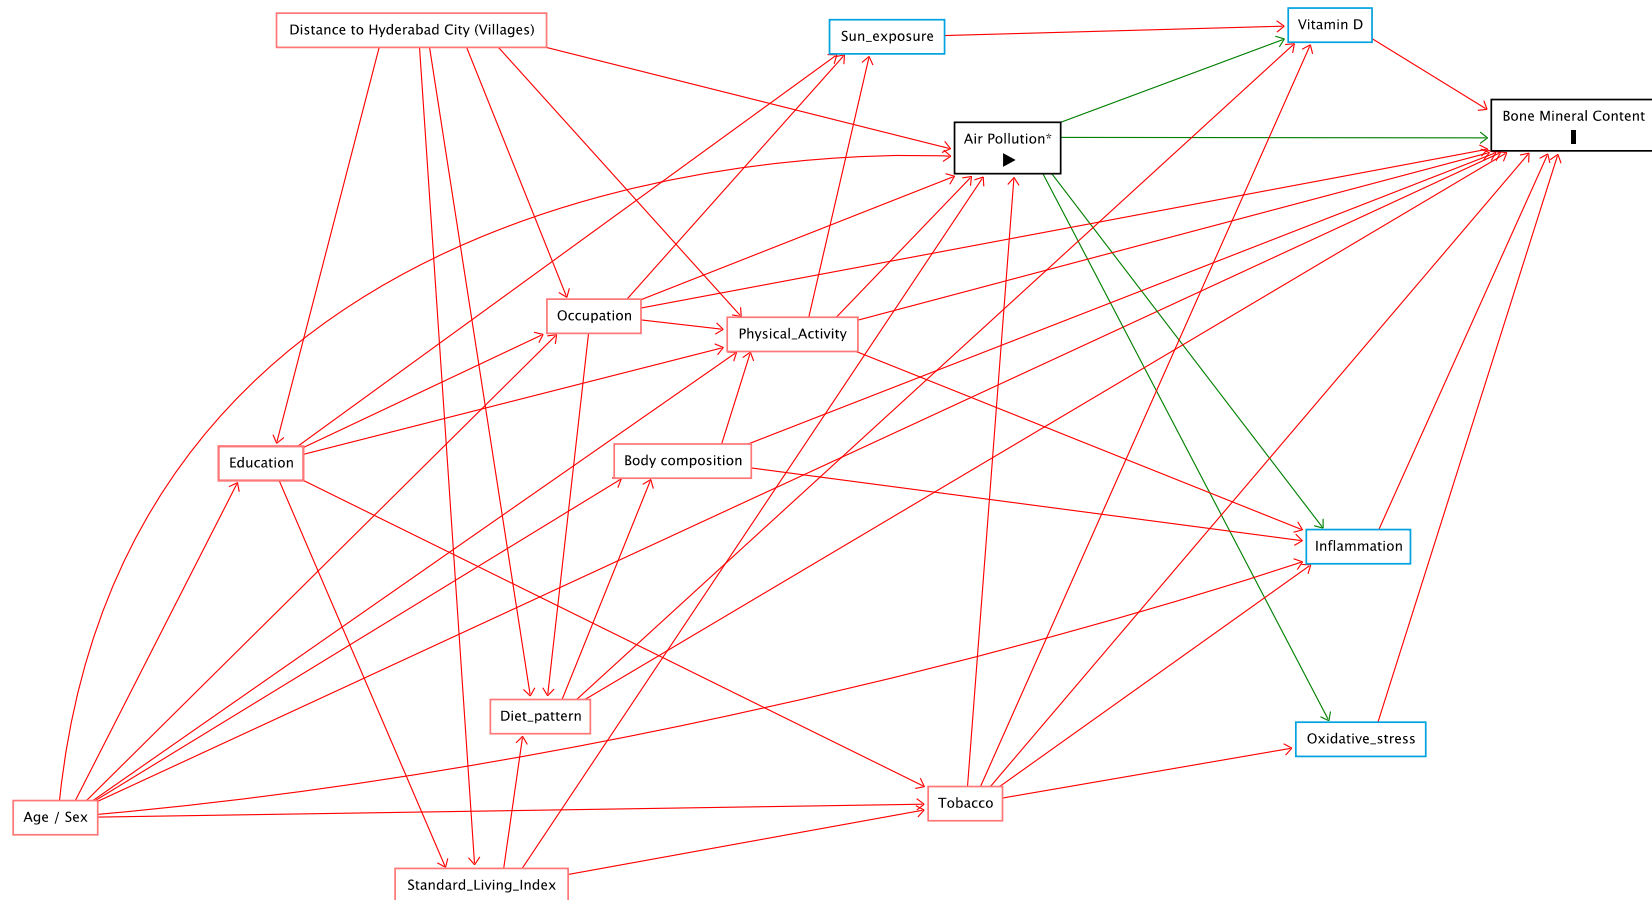

Draw using DAGitty (<http://dagitty.net>). Red boxes represent ancestors of the exposure and outcome. Black boxes represent the exposure and outcome. Blue boxes represent outcome ancestors and green lines causal pathways (mediators).<sup>2</sup>

**eAppendix 2.** Inverse Probability Weighting to Account for Potential Selection Bias

We used inverse probability weighting (IPW)<sup>3</sup> to account for differences between participants included in analyses (N=3717) and the adult population included in APCAPS, representative of the general population. We derived a binary variable describing whether each of the participants was included in the analysis sample (1 if included, 0 if not) and fitted a logistic regression model using the covariates available in the whole cohort (age, sex, villageID, occupation, education, smoking status, weight-bearing physical activity, SLI, height, calcium and fruit and vegetables intake). Being a young male, being unemployed or having an unskilled manual occupation, being an active smoker and eating more fruit and vegetables were associated with a higher odds of being in the analysis sample. There were also geographic differences between villages. The p-value of the Hosmer-Lemeshow test of the model was 0.23. We used this model to predict the probability (p) of each participant to be in the analysis sample and we derived weights as  $w = 1/p$ . Weights overlapped among participants in and out the analysis sample; the maximum weight was 12.5. We extracted the derived weights for the analysis population and used them in regression analyses, thus creating a pseudo population representative of the larger population.<sup>3</sup>

**eFigure 2.** Associations Between Age and Bone Mineral Content (BMC), Bone Area (BA), and Bone Mineral Density (BMD) by Sex

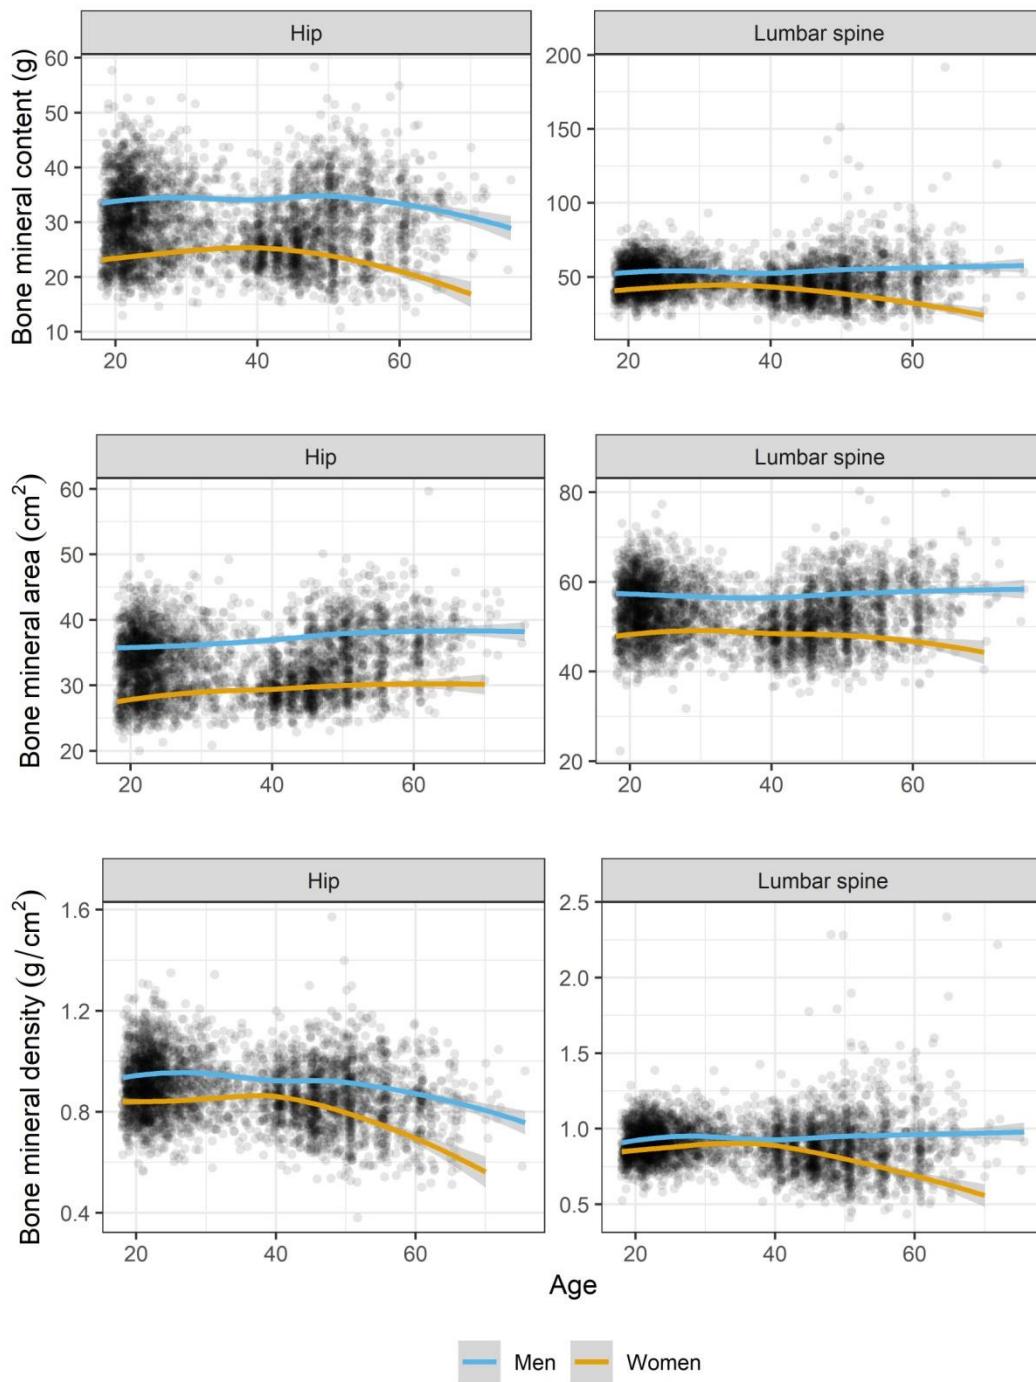

Smooth curves derived using local polynomial regression.

**eFigure 3.** Associations Between Bone Mineral Content (BMC) and Bone Area (BA)

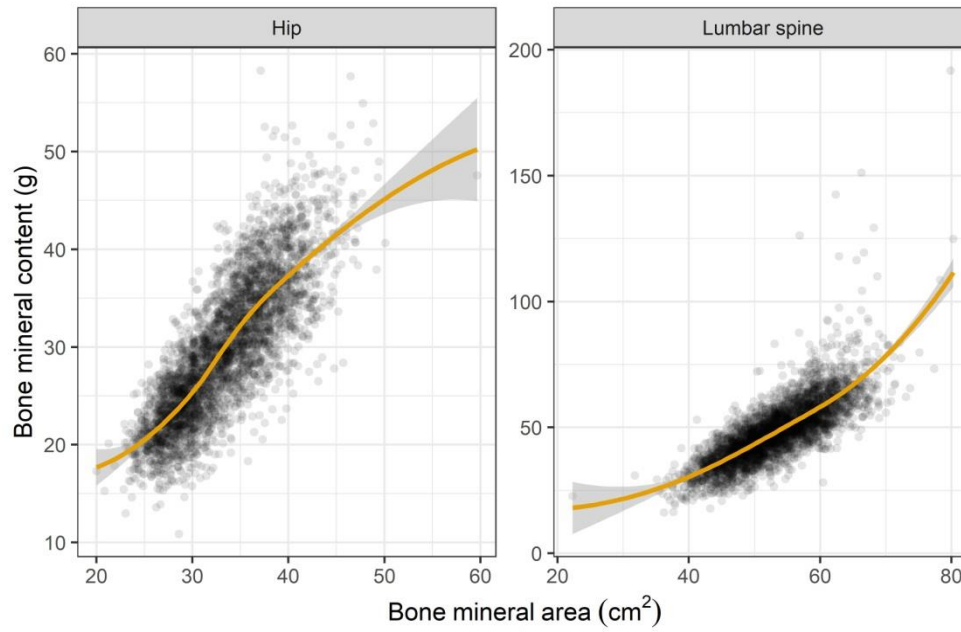

Smooth curves derived using local polynomial regression.



**eTable 1.** Mean Difference (95% CI) in Bone Mineral Content per Interquartile Range Increase in Annual Ambient Particulate Air Pollution, Without Inverse-Probability Correction (IPW).

|                      | PM <sub>2.5</sub><br>per 3 µg/m <sup>3</sup> increase | BC<br>per 1 µg/m <sup>3</sup> increase |
|----------------------|-------------------------------------------------------|----------------------------------------|
| Hip (g)              | mean difference (95% CI)                              | mean difference (95% CI)               |
| Model 1 <sup>a</sup> | -0.14 (-0.38, 0.1)                                    | -0.76 (-1.54, 0.03)                    |
| Model 2 <sup>b</sup> | -0.16 (-0.33, 0.01)                                   | -0.37 (-1.01, 0.26)                    |
| Model 3 <sup>c</sup> | -0.14 (-0.31, 0.02)                                   | -0.34 (-0.97, 0.28)                    |
| Model 4 <sup>d</sup> | -0.15 (-0.31, 0.02)                                   | -0.34 (-0.96, 0.28)                    |
| Lumbar spine (g)     |                                                       |                                        |
| Model 1 <sup>a</sup> | -0.57 (-1.09, -0.06)                                  | -1.04 (-2.76, 0.69)                    |
| Model 2 <sup>b</sup> | -0.58 (-1.09, -0.07)                                  | -1.01 (-2.71, 0.7)                     |
| Model 3 <sup>c</sup> | -0.56 (-1.07, -0.06)                                  | -0.99 (-2.68, 0.69)                    |
| Model 4 <sup>d</sup> | -0.54 (-1.04, -0.04)                                  | -0.97 (-2.64, 0.7)                     |

Mixed effects linear models with nested random intercepts (household within village) without using IPW.

Adjustment:

<sup>a</sup> Model 1: natural spline (bone area) + sex \* age + sex \* age<sup>2</sup> + DXA machine indicator

<sup>b</sup> Model 2: Model 1 + Height + Fat mass (%) + Lean mass (%)

<sup>c</sup> Model 3: Model 2 + Weight-bearing physical activity + log(Fruit and vegetables intake) + log(Calcium intake) + Current tobacco use + Primary cooking fuel

<sup>d</sup> Model 4: Model 3 + Occupation + Education + Socioeconomic status (SLI index)

BC: black carbon; PM<sub>2.5</sub>: particulate matter less than 2.5 micrometers in aerodynamic diameter

**eFigure 4.** Association Between Long-Term Ambient Particulate Air Pollution and Hip/Lumbar Spine Bone Mineral Content Corrected by Bone Area With vs Without Between-Within Exposure Specification

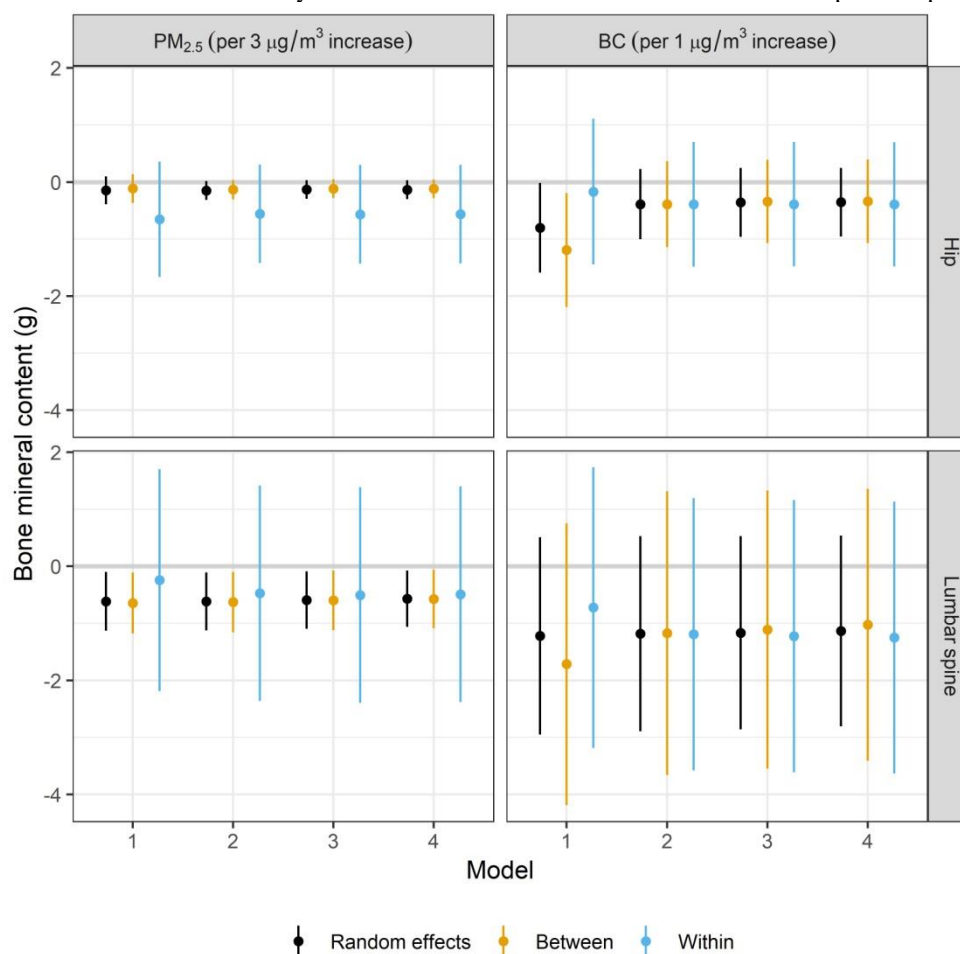

Mixed effects linear models with nested random intercepts (household within village) using inverse-probability weighting (IPW). Two different models with/without between-within specification of the exposure were run.

Adjustment:

Model 1: natural spline (bone area) + sex \* age + sex \* age<sup>2</sup> + DXA machine indicator

Model 2: Model 1 + Height + Fat mass (%) + Lean mass (%)

Model 3: Model 2 + Weight-bearing physical activity + log(Fruit and vegetables intake) + log(Calcium intake) + Current tobacco use + Primary cooking fuel

Model 4: Model 3 + Occupation + Education + Socioeconomic status (SLI index)

Abbreviations: BC, black carbon; PM<sub>2.5</sub>, particulate matter less than 2 µm in aerodynamic matter.

**eTable 2.** Mean Difference (95% CI) in Bone Mineral Density (BMD) per Interquartile Range Increase in Annual Ambient Particulate Air Pollution

|                                   | PM <sub>2.5</sub><br>per 3 µg/m <sup>3</sup> increase | BC<br>per 1 µg/m <sup>3</sup> increase |
|-----------------------------------|-------------------------------------------------------|----------------------------------------|
| Hip (g/cm <sup>2</sup> )          | mean difference (95% CI)                              | mean difference (95% CI)               |
| Model 1 <sup>a</sup>              | -0.005 (-0.012, 0.003)                                | -0.022 (-0.046, 0.002)                 |
| Model 2 <sup>b</sup>              | -0.004 (-0.009, 0.001)                                | -0.01 (-0.028, 0.008)                  |
| Model 3 <sup>c</sup>              | -0.004 (-0.008, 0.001)                                | -0.009 (-0.027, 0.009)                 |
| Model 4 <sup>d</sup>              | -0.004 (-0.008, 0.001)                                | -0.009 (-0.026, 0.009)                 |
| Lumbar spine (g/cm <sup>2</sup> ) |                                                       |                                        |
| Model 1 <sup>a</sup>              | -0.012 (-0.022, -0.002)                               | -0.019 (-0.052, 0.015)                 |
| Model 2 <sup>b</sup>              | -0.012 (-0.022, -0.001)                               | -0.013 (-0.046, 0.021)                 |
| Model 3 <sup>c</sup>              | -0.011 (-0.022, -0.001)                               | -0.013 (-0.046, 0.021)                 |
| Model 4 <sup>d</sup>              | -0.011 (-0.021, 0)                                    | -0.013 (-0.046, 0.021)                 |

Mixed effects linear models with nested random intercepts (household within village) using inverse-probability weighting (IPW). Adjustment:

<sup>a</sup> Model 1: sex \* age + sex \* age<sup>2</sup> + DXA machine indicator

<sup>b</sup> Model 2: Model 1 + Height + Fat mass (%) + Lean mass (%)

<sup>c</sup> Model 3: Model 2 + Weight-bearing physical activity + log(Fruit and vegetables intake) + log(Calcium intake) + Current tobacco use + Primary cooking fuel

<sup>d</sup> Model 4: Model 3 + Occupation + Education + Socioeconomic status (SLI index)

BC: black carbon; PM<sub>2.5</sub>: particulate matter less than 2.5 micrometers in aerodynamic diameter

**eTable 3.** Single and Multi-Pollutant Models for the Mean Difference (95% CI) in Bone Mineral Content and Bone Mineral Density per Interquartile Range Increase in Annual Ambient Particulate Air Pollution

|                                   | Single-pollutant model                                   | Single-pollutant model                 | Multi-pollutant model                                 |                                           |
|-----------------------------------|----------------------------------------------------------|----------------------------------------|-------------------------------------------------------|-------------------------------------------|
|                                   | PM <sub>2.5</sub><br>per 3 µg/m <sup>3</sup><br>increase | BC<br>per 1 µg/m <sup>3</sup> increase | PM <sub>2.5</sub><br>per 3 µg/m <sup>3</sup> increase | BC<br>per 1 µg/m <sup>3</sup><br>increase |
|                                   | mean difference<br>(95% CI)                              | mean difference<br>(95% CI)            | mean difference<br>(95% CI)                           | mean difference<br>(95% CI)               |
| <b>BMC</b>                        |                                                          |                                        |                                                       |                                           |
| Hip (g)                           |                                                          |                                        |                                                       |                                           |
| Model 4 <sup>a</sup>              | -0.13 (-0.3, 0.03),<br>se = 0.083                        | -0.35 (-0.96, 0.25),<br>se = 0.308     | -0.12 (-0.34, 0.09),<br>se = 0.110                    | -0.07 (-0.85, 0.72),<br>se = 0.401        |
| Lumbar spine (g)                  |                                                          |                                        |                                                       |                                           |
| Model 4 <sup>a</sup>              | -0.57 (-1.06, -0.07),<br>se = 0.252                      | -1.13 (-2.81, 0.54),<br>se = 0.854     | -0.56 (-1.18, 0.05),<br>se = 0.314                    | -0.04 (-2.05, 1.97),<br>se = 1.03         |
| <b>BMD</b>                        |                                                          |                                        |                                                       |                                           |
| Hip (g/cm <sup>2</sup> )          |                                                          |                                        |                                                       |                                           |
| Model 4 <sup>b</sup>              | -0.004 (-0.008, 0.001),<br>se = 0.002                    | -0.009 (-0.026, 0.009),<br>se = 0.009  | -0.004 (-0.010, 0.003),<br>se = 0.003                 | 0 (-0.023, 0.023),<br>se = 0.012          |
| Lumbar spine (g/cm <sup>2</sup> ) |                                                          |                                        |                                                       |                                           |
| Model 4 <sup>b</sup>              | -0.011 (-0.021, 0),<br>se = 0.005                        | -0.013 (-0.046, 0.021),<br>se = 0.017  | -0.013 (-0.025, 0),<br>se = 0.006                     | 0.009 (-0.030, 0.049),<br>se = 0.020      |

Mixed effects linear models with nested random intercepts (household within village) using inverse-probability weighting (IPW).

Adjustment:

<sup>a</sup> Model 4: natural spline (bone area) + sex \* age + sex \* age<sup>2</sup> + DXA machine indicator + Height + Fat mass (%) + Lean mass (%) + Weight-bearing physical activity + log(Fruit and vegetables intake) + log(Calcium intake) + Current tobacco use + Primary cooking fuel + Occupation + Education + Socioeconomic status (SLI index)

<sup>b</sup> Model 4: sex \* age + sex \* age<sup>2</sup> + DXA machine indicator + Height + Fat mass (%) + Lean mass (%) + Weight-bearing physical activity + log(Fruit and vegetables intake) + log(Calcium intake) + Current tobacco use + Primary cooking fuel + Occupation + Education + Socioeconomic status (SLI index)

BC: black carbon; BMC: bone mineral content; BMD: bone mineral density; PM<sub>2.5</sub>: particulate matter less than 2.5 micrometers in aerodynamic diameter; se: coefficient standard error.

**eTable 4.** Association Between Annual Ambient Particulate Air Pollution and Bone Mineral Content at the Hip and Lumbar Spine Sites Among Those Aged  $\geq 40$  Years (n=1639)

|                      | PM <sub>2.5</sub><br>per 3 $\mu\text{g}/\text{m}^3$ increase | BC<br>per 1 $\mu\text{g}/\text{m}^3$ increase |
|----------------------|--------------------------------------------------------------|-----------------------------------------------|
| Hip (g)              | mean difference (95% CI)                                     | mean difference (95% CI)                      |
| Model 1 <sup>a</sup> | -0.39 (-0.67, -0.12)                                         | -1.56 (-2.49, -0.62)                          |
| Model 2 <sup>b</sup> | -0.40 (-0.67, -0.13)                                         | -0.69 (-1.68, 0.30)                           |
| Model 3 <sup>c</sup> | -0.36 (-0.63, -0.10)                                         | -0.63 (-1.60, 0.33)                           |
| Model 4 <sup>d</sup> | -0.37 (-0.63, -0.11)                                         | -0.69 (-1.64, 0.27)                           |
| Lumbar spine (g)     |                                                              |                                               |
| Model 1 <sup>a</sup> | -0.96 (-1.80, -0.11)                                         | -0.92 (-3.78, 1.94)                           |
| Model 2 <sup>b</sup> | -0.90 (-1.70, -0.09)                                         | -1.17 (-3.91, 1.56)                           |
| Model 3 <sup>c</sup> | -0.88 (-1.70, -0.06)                                         | -1.17 (-3.93, 1.58)                           |
| Model 4 <sup>d</sup> | -0.86 (-1.66, -0.06)                                         | -1.20 (-3.91, 1.51)                           |

Mixed effects linear models with nested random intercepts (household within village) using inverse-probability weighting (IPW).

Adjustment:

<sup>a</sup> Model 1: natural spline (bone area) + sex \* age + DXA machine indicator

<sup>b</sup> Model 2: Model 1 + Height + Fat mass (%) + Lean mass (%)

<sup>c</sup> Model 3: Model 2 + Weight-bearing physical activity + log(Fruit and vegetables intake) + log(Calcium intake) + Current tobacco use + Primary cooking fuel

<sup>d</sup> Model 4: Model 3 + Occupation + Education + Socioeconomic status (SLI index)

BC: black carbon; PM<sub>2.5</sub>: particulate matter less than 2.5 micrometers in aerodynamic diameter.

**eTable 5.** Association Between Annual Ambient Particulate Air Pollution and Bone Mineral Density at the Hip and Lumbar Spine Sites Among Those Aged  $\geq 40$  Years (n=1639)

|                                         | PM <sub>2.5</sub><br>per 3 $\mu\text{g}/\text{m}^3$ increase | BC<br>per 1 $\mu\text{g}/\text{m}^3$ increase |
|-----------------------------------------|--------------------------------------------------------------|-----------------------------------------------|
| Hip ( $\text{g}/\text{cm}^2$ )          | mean difference (95% CI)                                     | mean difference (95% CI)                      |
| Model 1 <sup>a</sup>                    | -0.011 (-0.019, -0.003)                                      | -0.042 (-0.069, -0.014)                       |
| Model 2 <sup>b</sup>                    | -0.010 (-0.017, -0.003)                                      | -0.019 (-0.046, 0.008)                        |
| Model 3 <sup>c</sup>                    | -0.009 (-0.016, -0.003)                                      | -0.017 (-0.043, 0.008)                        |
| Model 4 <sup>d</sup>                    | -0.010 (-0.016, -0.003)                                      | -0.019 (-0.044, 0.007)                        |
| Lumbar spine ( $\text{g}/\text{cm}^2$ ) |                                                              |                                               |
| Model 1 <sup>a</sup>                    | -0.021 (-0.039, -0.002)                                      | -0.016 (-0.075, 0.042)                        |
| Model 2 <sup>b</sup>                    | -0.019 (-0.039, 0)                                           | -0.006 (-0.065, 0.054)                        |
| Model 3 <sup>c</sup>                    | -0.019 (-0.038, 0.001)                                       | -0.006 (-0.065, 0.054)                        |
| Model 4 <sup>d</sup>                    | -0.018 (-0.038, 0.001)                                       | -0.007 (-0.066, 0.052)                        |

Mixed effects linear models with nested random intercepts (household within village)

using inverse-probability weighting (IPW). Adjustment:

<sup>a</sup>Model 1: sex \* age + DXA machine indicator

<sup>b</sup>Model 2: Model 1 + Height + Fat mass (%) + Lean mass (%)

<sup>c</sup>Model 3: Model 2 + Weight-bearing physical activity + log(Fruit and vegetables intake)

+ log(Calcium intake) + Current tobacco use + Primary cooking fuel

<sup>d</sup>Model 4: Model 3 + Occupation + Education + Socioeconomic status (SLI index)

BC: black carbon; PM<sub>2.5</sub>: particulate matter less than 2.5 micrometers in aerodynamic diameter.

**eFigure 5.** Association Between Biomass Fuel and Hip/Lumbar Spine Bone Mineral Density (BMD) in All Population vs Exposure-Sex Interaction

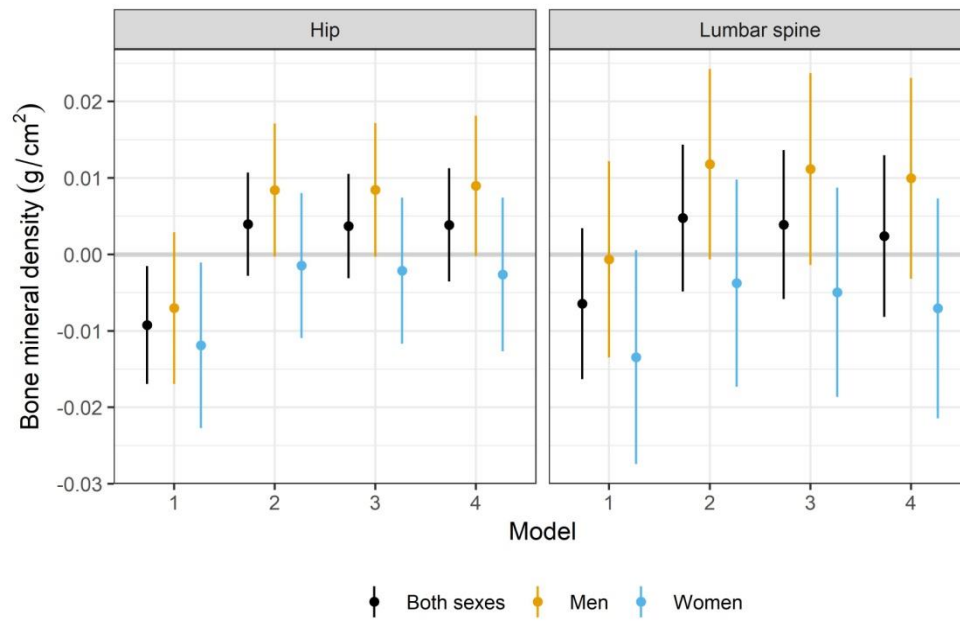

Mixed effects linear models with nested random intercepts (household within village) using IPW. Two different models with/without exposure-sex interactions were run. Adjustment:

Model 1: sex \* age + sex \* age<sup>2</sup> + DXA machine indicator

Model 2: Model 1 + Height + Fat mass (%) + Lean mass (%)

Model 3: Model 2 + Weight-bearing physical activity + log(Fruit and vegetables intake) + log(Calcium intake) + Current tobacco use

Model 4: Model 3 + Occupation + Education + Socioeconomic status (SLI index)



**eFigure 6.** Association Between Biomass Fuel and Hip/Lumbar Spine Bone Mineral Content Corrected by Bone Area in All Population vs Exposure-Sex Interaction (Among Those Aged  $\geq 40$  Years)

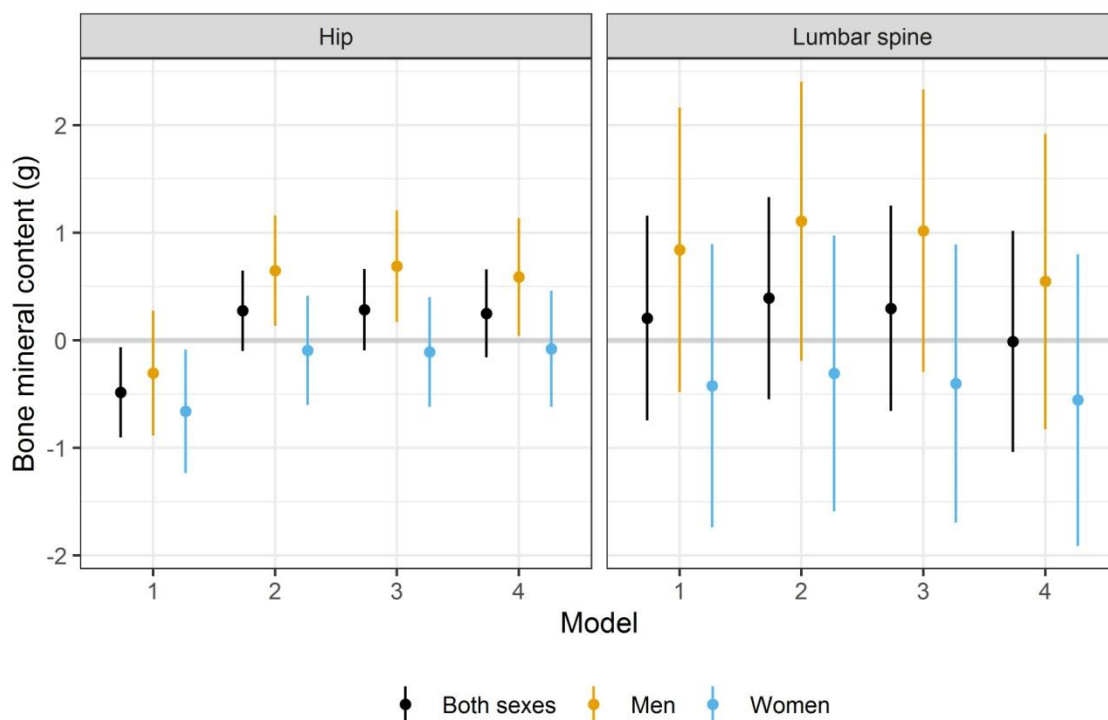

Mixed effects linear models with nested random intercepts (household within village) using inverse-probability weighting (IPW). Two different models with/without exposure-sex interactions were run. Adjustment:

<sup>a</sup> Model 1: natural spline (bone area) + sex \* age + DXA machine indicator

<sup>b</sup> Model 2: Model 1 + Height + Fat mass (%) + Lean mass (%)

<sup>c</sup> Model 3: Model 2 + Weight-bearing physical activity + log(Fruit and vegetables intake) + log(Calcium intake) + Current tobacco use

<sup>d</sup> Model 4: Model 3 + Occupation + Education + Socioeconomic status (SLI index)

**eFigure 7.** Association Between Biomass Fuel and Hip/Lumbar Spine Bone Mineral Density (BMD) in All Population vs Exposure-Sex Interaction (Among Those Aged  $\geq 40$  Years)

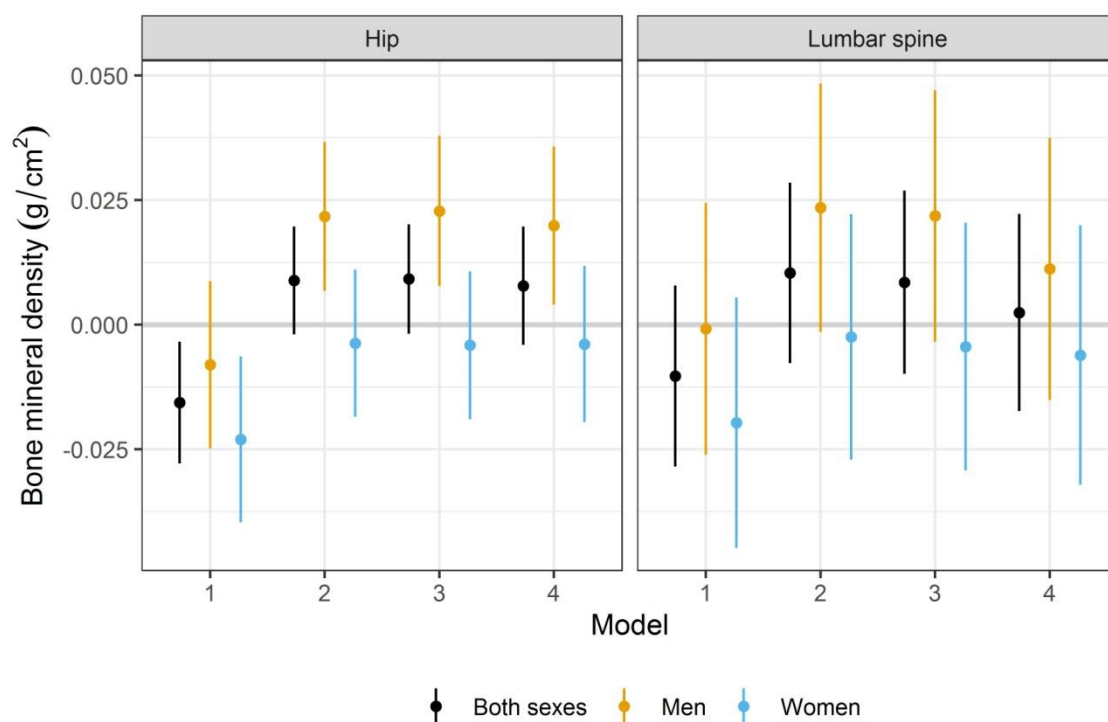

Mixed effects linear models with nested random intercepts (household within village) using IPW. Two different models with/without exposure-sex interactions were run. Adjustment:

Model 1: sex \* age + DXA machine indicator

Model 2: Model 1 + Height + Fat mass (%) + Lean mass (%)

Model 3: Model 2 + Weight-bearing physical activity + log(Fruit and vegetables intake) + log(Calcium intake) + Current tobacco use

Model 4: Model 3 + Occupation + Education + Socioeconomic status (SLI index)

**eReferences**

1. Hughes RA, Heron J, Sterne JAC, Tilling K. Accounting for missing data in statistical analyses: multiple imputation is not always the answer. *Int J Epidemiol.* 2019;48(4):1294-1304. doi:10.1093/ije/dyz032
2. Lederer DJ, Bell SC, Branson RD, et al. Control of confounding and reporting of results in causal inference studies. *Ann Am Thorac Soc.* 2019;16(1):22-28. doi:10.1513/AnnalsATS.201808-564PS
3. Seaman SR, White IR. Review of inverse probability weighting for dealing with missing data. *Stat Methods Med Res.* 2013;22(3):278-295. doi:10.1177/0962280210395740
